# Supplementary material for: Impact of circadian rhythm-based radiotherapy timing on toxicities in localised prostate cancer patients: a prospective cohort study protocol
Source: Research Square preprint supplement (doi:10.21203/rs.3.rs-6220919/v1), 2025-04-17
Supplement: Supplementary file 1 [file 4aaca092f43dab46e02d369b.docx]

**Supplementary Figure 1.** Chronogram of the collection process.


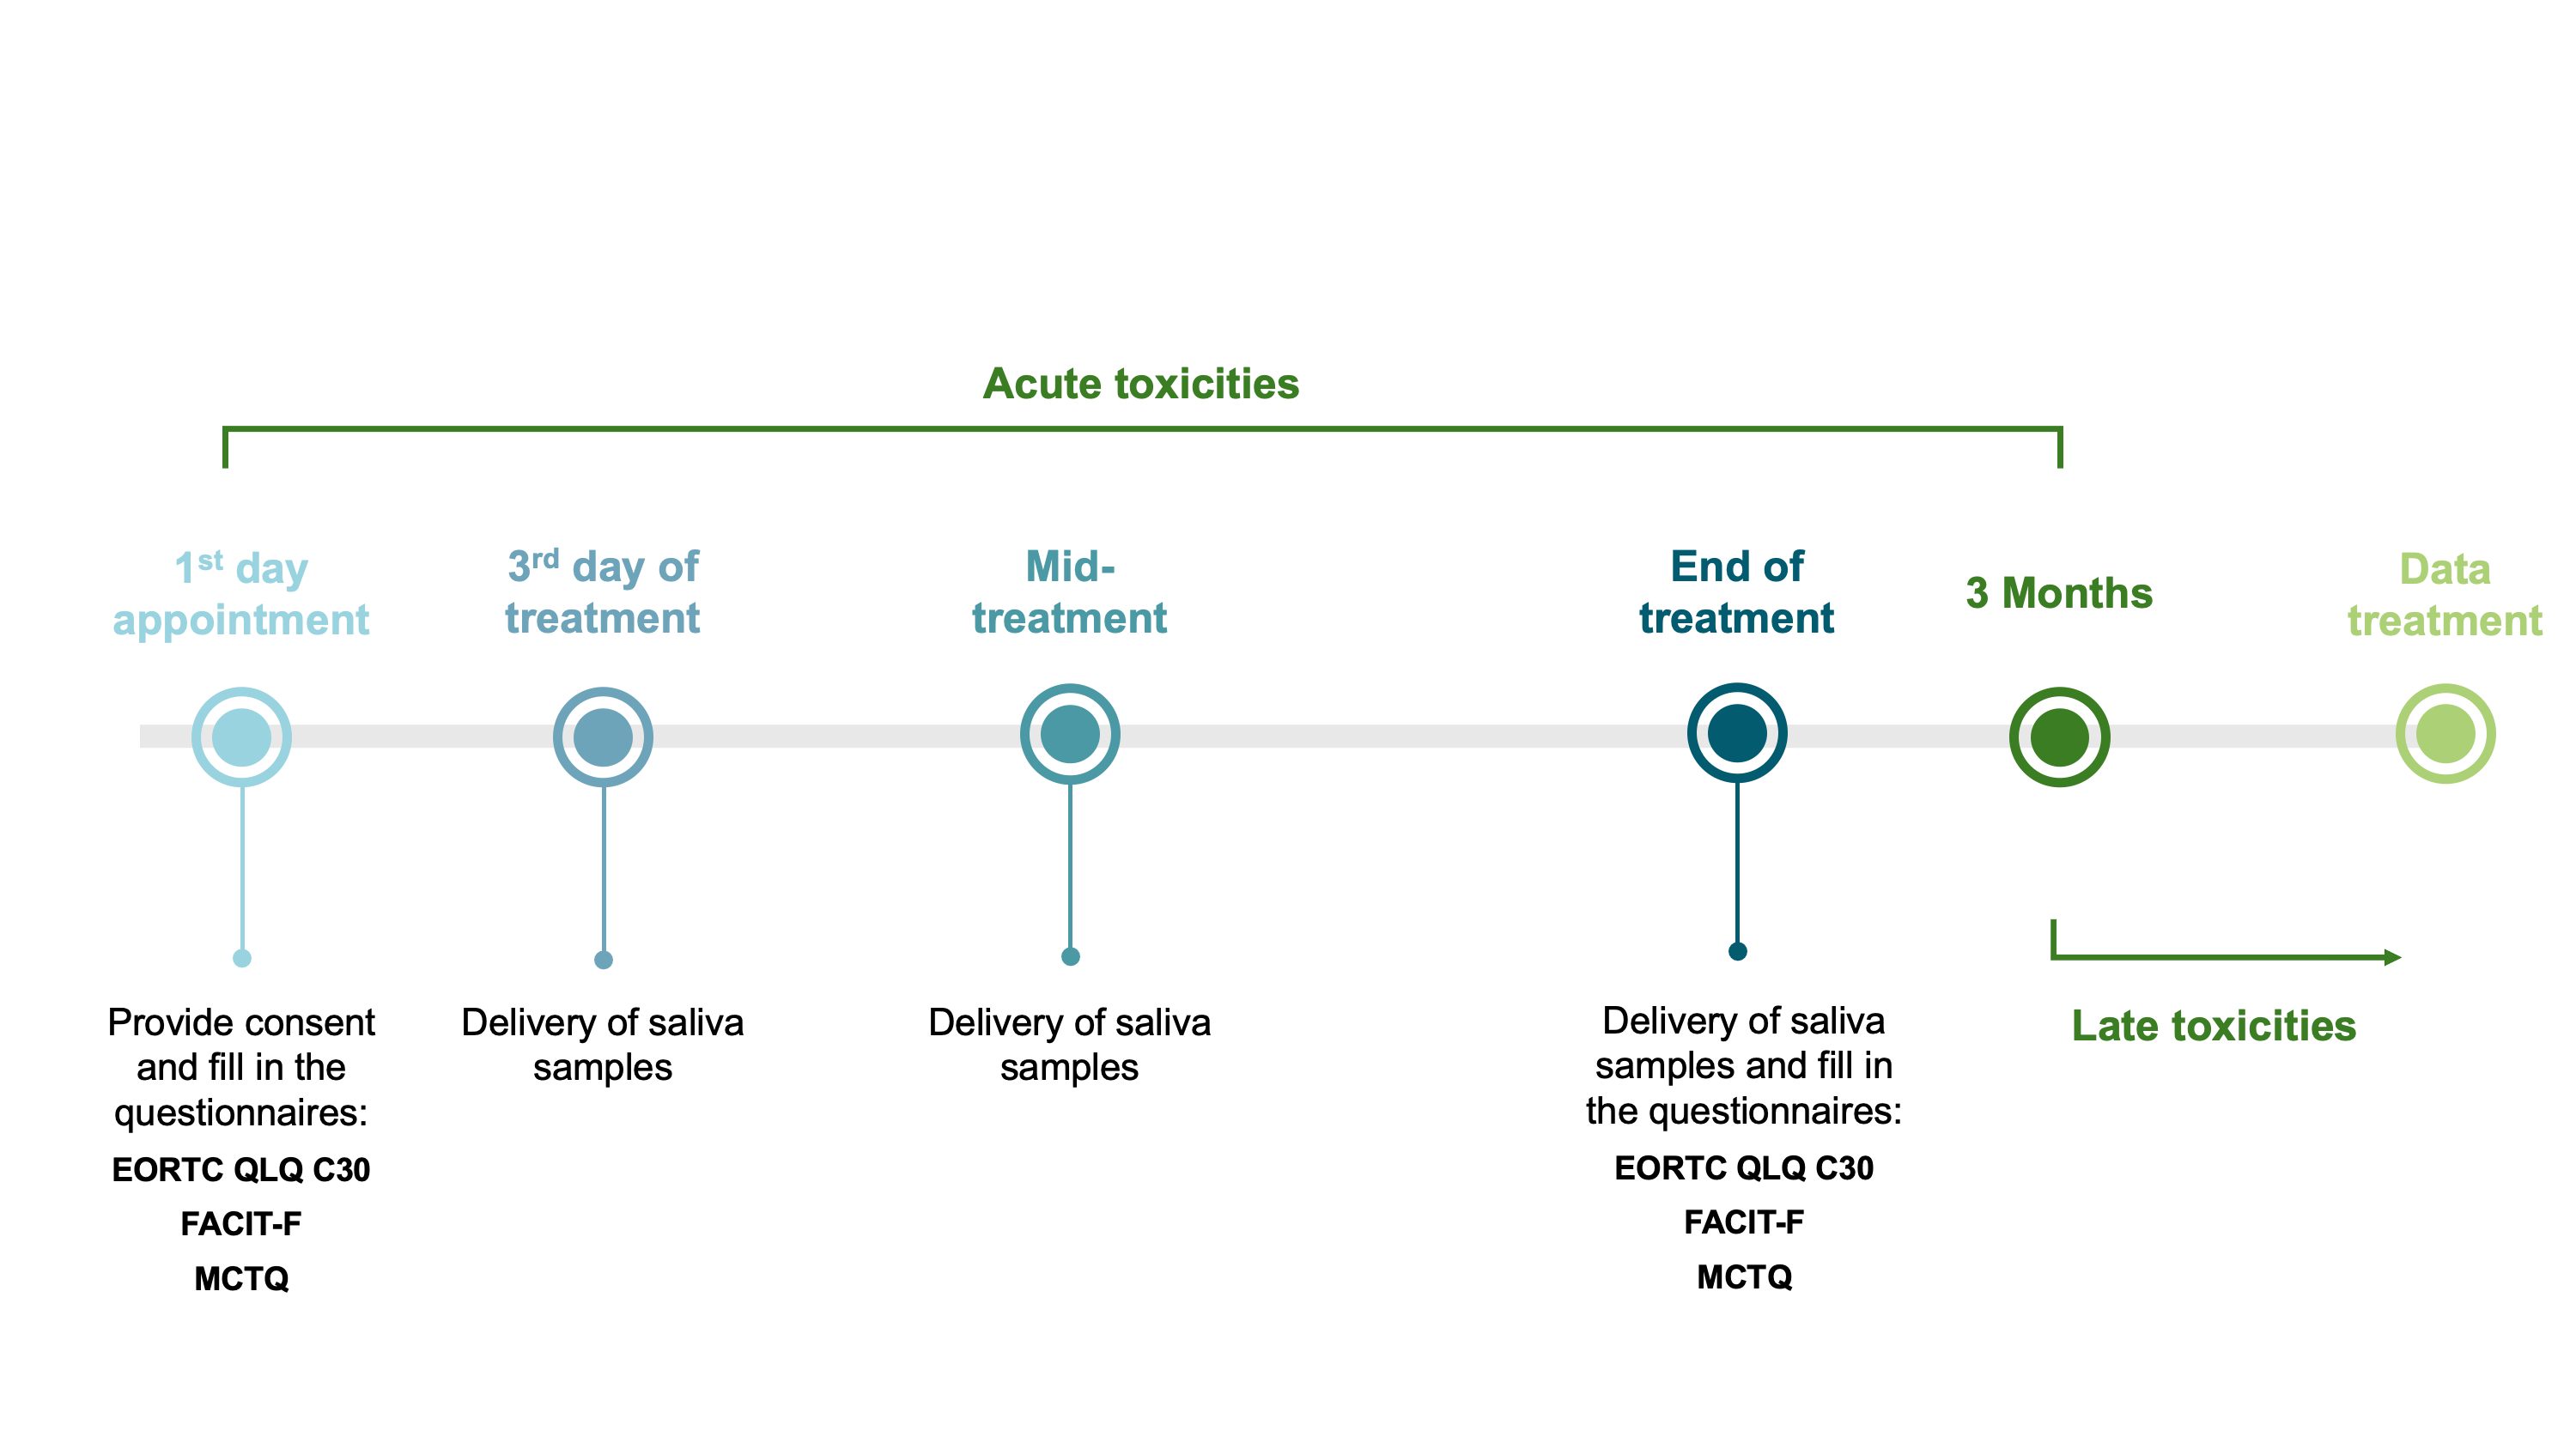


**Supplementary Figure 2.** Instructions flyer (front and back; English version).

**Supplementary Figure 3.** Time sheet for the collection times registration (English version).
